# Supplementary material for: Myeloid cells in circulation and tumor microenvironment of breast cancer patients
Source: Springer Nature journal article supplement (doi:10.1007/s00262-017-1977-z), 2017-03-09
Supplement: MOESM1 [file 12131476]

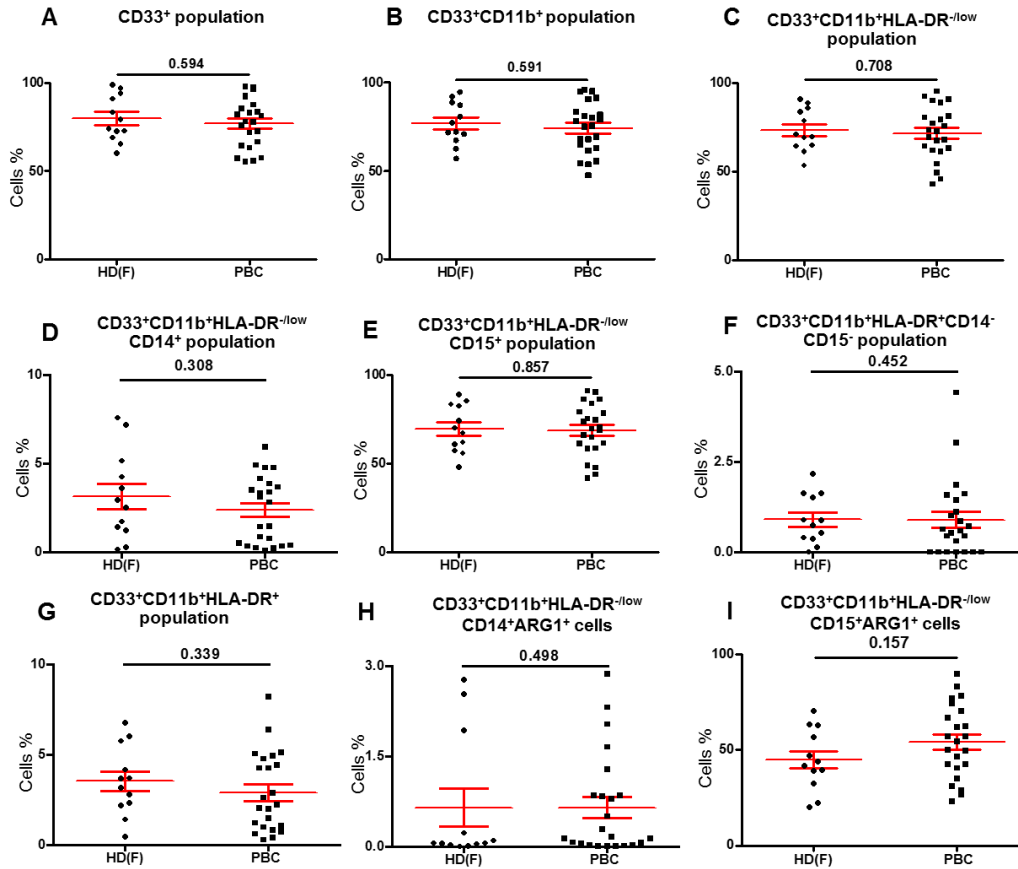

**Supplementary Figure 1: Comparisons of levels of different subsets of circulating myeloid cells between female HD (HD(F)) and PBC patients.** Peripheral blood from 12 female HD and 23 PBC patients was stained for myeloid markers. Scatter plots show the mean of calculated percentages  $\pm$  SEM of CD33<sup>+</sup> cells (A), CD33<sup>+</sup>CD11b<sup>+</sup> cells (B), CD33<sup>+</sup>CD11b<sup>+</sup>HLA-DR<sup>-low</sup> cells (C), CD33<sup>+</sup>CD11b<sup>+</sup>HLA-DR<sup>-low</sup>CD14<sup>+</sup> cells (D), CD33<sup>+</sup>CD11b<sup>+</sup>HLA-DR<sup>-low</sup>CD15<sup>+</sup> cells (E), CD33<sup>+</sup>CD11b<sup>+</sup>HLA-DR<sup>-low</sup>CD14<sup>-</sup>CD15<sup>-</sup> cells (F), CD33<sup>+</sup>CD11b<sup>+</sup>HLA-DR<sup>+</sup> cells (G), CD33<sup>+</sup>CD11b<sup>+</sup>HLA-DR<sup>-low</sup>CD14<sup>+</sup>ARG1<sup>+</sup> cells (H) and CD33<sup>+</sup>CD11b<sup>+</sup>HLA-DR<sup>-low</sup>CD15<sup>+</sup>ARG1<sup>+</sup> cells (I).

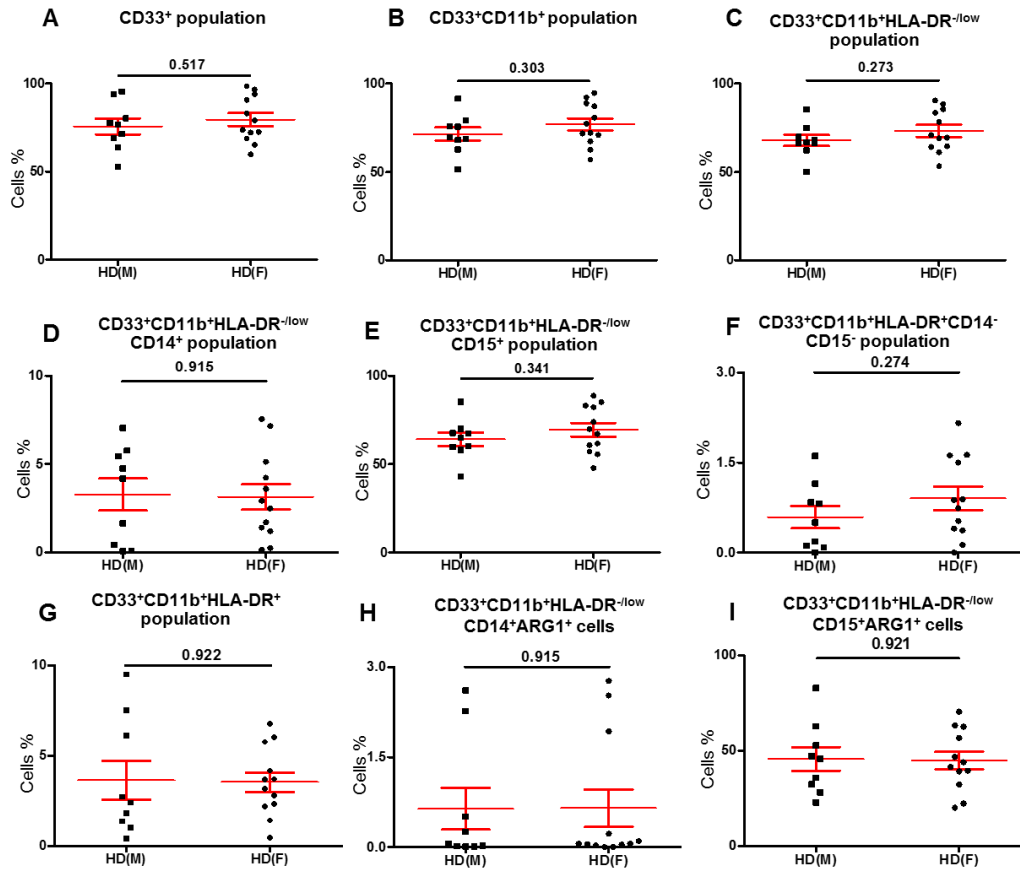

**Supplementary Figure 2: Comparisons of levels of different subsets of circulating myeloid cells between male HD (HD(M)) and female HD (HD(F)).** Peripheral blood from 9 HD(M) and 12 HD(F) was stained for myeloid markers. Scatter plots show the mean of calculated percentages  $\pm$  SEM of CD33<sup>+</sup> cells (A), CD33<sup>+</sup>CD11b<sup>+</sup> cells (B), CD33<sup>+</sup>CD11b<sup>+</sup>HLA-DR<sup>-low</sup> cells (C), CD33<sup>+</sup>CD11b<sup>+</sup>HLA-DR<sup>-low</sup>CD14<sup>+</sup> cells (D), CD33<sup>+</sup>CD11b<sup>+</sup>HLA-DR<sup>-low</sup>CD15<sup>+</sup> cells (E), CD33<sup>+</sup>CD11b<sup>+</sup>HLA-DR<sup>-low</sup>CD14<sup>-</sup>CD15<sup>+</sup> cells (F), CD33<sup>+</sup>CD11b<sup>+</sup>HLA-DR<sup>+</sup> cells (G), CD33<sup>+</sup>CD11b<sup>+</sup>HLA-DR<sup>-low</sup>CD14<sup>+</sup>ARG1<sup>+</sup> cells (H) and CD33<sup>+</sup>CD11b<sup>+</sup>HLA-DR<sup>-low</sup>CD15<sup>+</sup>ARG1<sup>+</sup> cells (I).
